# Supplementary material for: A study on the quality evaluation index system of smart home care for older adults in the community ——based on Delphi and AHP
Source: BMC Public Health. 2023 Mar 1;23:411. doi: 10.1186/s12889-023-15262-1 (PMC9975439; doi:10.1186/s12889-023-15262-1)
Supplement: Supplementary file 1 — Additional file 1. Judgement Matrix of smart medical care assistance. [file 12889_2023_15262_MOESM1_ESM.xlsx]

## Sheet: Sheet1
index	With electronic health records, platform supports users to make online consultation, appointment, consultation and feedback	Intelligent monitoring and sensing devices available to accurately monitoring the user's health indicators in real time and effectively warn of health hazards	Services provided by professional staff, available to effective diagnostic treatment, rehabilitation care, and make adjustments to feedback	Platform, system focus on user privacy protection	Platform available to respond and meet the needs of users in a timely manner	Platform available to develops plans with reasonable pricing based on the user's health status and needs	The intelligent medical and nursing equipment with simple interface, easy to learn and operate, time-saving
With electronic health records, platform supports users to make online consultation, appointment, consultation and feedback	1	0.333333	0.333333	3	1	1	3
Intelligent monitoring and sensing devices available to accurately monitoring the user's health indicators in real time and effectively warn of health hazards	3	1	1	5	3	3	5
Services provided by professional staff, available to effective diagnostic treatment, rehabilitation care, and make adjustments to feedback	3	1	1	5	2	2	3
Platform, system focus on user privacy protection	0.333333	0.2	0.2	1	0.2	0.333333	0.5
Platform available to respond and meet the needs of users in a timely manner	1	0.333333	0.5	5	1	2	3		Expert1
Platform available to develops plans with reasonable pricing based on the user's health status and needs	1	0.333333	0.5	3	0.5	1	5
The intelligent medical and nursing equipment with simple interface, easy to learn and operate, time-saving	0.333333	0.2	0.333333	2	0.333333	0.2	1
index	With electronic health records, platform supports users to make online consultation, appointment, consultation and feedback	Intelligent monitoring and sensing devices available to accurately monitoring the user's health indicators in real time and effectively warn of health hazards	Services provided by professional staff, available to effective diagnostic treatment, rehabilitation care, and make adjustments to feedback	Platform, system focus on user privacy protection	Platform available to respond and meet the needs of users in a timely manner	Platform available to develops plans with reasonable pricing based on the user's health status and needs	The intelligent medical and nursing equipment with simple interface, easy to learn and operate, time-saving
With electronic health records, platform supports users to make online consultation, appointment, consultation and feedback	1	0.333333	0.333333	3	1	1	3
Intelligent monitoring and sensing devices available to accurately monitoring the user's health indicators in real time and effectively warn of health hazards	3	1	1	5	3	3	5
Services provided by professional staff, available to effective diagnostic treatment, rehabilitation care, and make adjustments to feedback	3	1	1	5	2	2	3
Platform, system focus on user privacy protection	0.333333	0.2	0.2	1	0.2	0.333333	0.5		Expert2
Platform available to respond and meet the needs of users in a timely manner	1	0.333333	0.5	5	1	2	3
Platform available to develops plans with reasonable pricing based on the user's health status and needs	1	0.333333	0.5	3	0.5	1	5
The intelligent medical and nursing equipment with simple interface, easy to learn and operate, time-saving	0.333333	0.2	0.333333	2	0.333333	0.2	1
index	With electronic health records, platform supports users to make online consultation, appointment, consultation and feedback	Intelligent monitoring and sensing devices available to accurately monitoring the user's health indicators in real time and effectively warn of health hazards	Services provided by professional staff, available to effective diagnostic treatment, rehabilitation care, and make adjustments to feedback	Platform, system focus on user privacy protection	Platform available to respond and meet the needs of users in a timely manner	Platform available to develops plans with reasonable pricing based on the user's health status and needs	The intelligent medical and nursing equipment with simple interface, easy to learn and operate, time-saving
With electronic health records, platform supports users to make online consultation, appointment, consultation and feedback	1	7	7	9	7	1	9
Intelligent monitoring and sensing devices available to accurately monitoring the user's health indicators in real time and effectively warn of health hazards	0.142857	1	1	5	7	0.333333	5
Services provided by professional staff, available to effective diagnostic treatment, rehabilitation care, and make adjustments to feedback	0.142857	1	1	5	7	0.333333	5
Platform, system focus on user privacy protection	0.111111	0.2	0.2	1	0.2	0.2	0.2		Expert3
Platform available to respond and meet the needs of users in a timely manner	0.142857	0.142857	0.142857	5	1	9	7
Platform available to develops plans with reasonable pricing based on the user's health status and needs	1	3	3	5	0.111111	1	1
The intelligent medical and nursing equipment with simple interface, easy to learn and operate, time-saving	0.111111	0.2	0.2	5	0.142857	1	1
index	With electronic health records, platform supports users to make online consultation, appointment, consultation and feedback	Intelligent monitoring and sensing devices available to accurately monitoring the user's health indicators in real time and effectively warn of health hazards	Services provided by professional staff, available to effective diagnostic treatment, rehabilitation care, and make adjustments to feedback	Platform, system focus on user privacy protection	Platform available to respond and meet the needs of users in a timely manner	Platform available to develops plans with reasonable pricing based on the user's health status and needs	The intelligent medical and nursing equipment with simple interface, easy to learn and operate, time-saving
With electronic health records, platform supports users to make online consultation, appointment, consultation and feedback	1	0.333333	4	7	0.142857	5	0.5
Intelligent monitoring and sensing devices available to accurately monitoring the user's health indicators in real time and effectively warn of health hazards	3	1	3	7	0.2	7	5
Services provided by professional staff, available to effective diagnostic treatment, rehabilitation care, and make adjustments to feedback	0.25	0.333333	1	3	0.142857	3	0.5
Platform, system focus on user privacy protection	0.142857	0.142857	0.333333	1	0.111111	0.333333	0.333333		Expert4
Platform available to respond and meet the needs of users in a timely manner	7	5	7	9	1	9	7
Platform available to develops plans with reasonable pricing based on the user's health status and needs	0.2	0.142857	0.333333	3	0.111111	1	0.333333
The intelligent medical and nursing equipment with simple interface, easy to learn and operate, time-saving	2	0.2	2	3	0.142857	3	1
index	With electronic health records, platform supports users to make online consultation, appointment, consultation and feedback	Intelligent monitoring and sensing devices available to accurately monitoring the user's health indicators in real time and effectively warn of health hazards	Services provided by professional staff, available to effective diagnostic treatment, rehabilitation care, and make adjustments to feedback	Platform, system focus on user privacy protection	Platform available to respond and meet the needs of users in a timely manner	Platform available to develops plans with reasonable pricing based on the user's health status and needs	The intelligent medical and nursing equipment with simple interface, easy to learn and operate, time-saving
With electronic health records, platform supports users to make online consultation, appointment, consultation and feedback	1	1	1	3	0.333333	1	2
Intelligent monitoring and sensing devices available to accurately monitoring the user's health indicators in real time and effectively warn of health hazards	1	1	1	3	1	1	2		Expert5
Services provided by professional staff, available to effective diagnostic treatment, rehabilitation care, and make adjustments to feedback	1	1	1	5	1	1	2
Platform, system focus on user privacy protection	0.333333	0.333333	0.2	1	0.333333	0.333333	0.333333
Platform available to respond and meet the needs of users in a timely manner	3	1	1	3	1	1	1
Platform available to develops plans with reasonable pricing based on the user's health status and needs	1	1	1	3	1	1	1
The intelligent medical and nursing equipment with simple interface, easy to learn and operate, time-saving	0.5	0.5	0.5	3	1	1	1
index	With electronic health records, platform supports users to make online consultation, appointment, consultation and feedback	Intelligent monitoring and sensing devices available to accurately monitoring the user's health indicators in real time and effectively warn of health hazards	Services provided by professional staff, available to effective diagnostic treatment, rehabilitation care, and make adjustments to feedback	Platform, system focus on user privacy protection	Platform available to respond and meet the needs of users in a timely manner	Platform available to develops plans with reasonable pricing based on the user's health status and needs	The intelligent medical and nursing equipment with simple interface, easy to learn and operate, time-saving
With electronic health records, platform supports users to make online consultation, appointment, consultation and feedback	1	1	1	1	1	1	0.333333
Intelligent monitoring and sensing devices available to accurately monitoring the user's health indicators in real time and effectively warn of health hazards	1	1	1	1	1	1	0.333333
Services provided by professional staff, available to effective diagnostic treatment, rehabilitation care, and make adjustments to feedback	1	1	1	5	1	1	0.333333		Expert6
Platform, system focus on user privacy protection	1	1	0.2	1	1	1	0.333333
Platform available to respond and meet the needs of users in a timely manner	1	1	1	1	1	1	0.333333
Platform available to develops plans with reasonable pricing based on the user's health status and needs	1	1	1	1	1	1	0.333333
The intelligent medical and nursing equipment with simple interface, easy to learn and operate, time-saving	3	3	3	3	3	3	1
index	With electronic health records, platform supports users to make online consultation, appointment, consultation and feedback	Intelligent monitoring and sensing devices available to accurately monitoring the user's health indicators in real time and effectively warn of health hazards	Services provided by professional staff, available to effective diagnostic treatment, rehabilitation care, and make adjustments to feedback	Platform, system focus on user privacy protection	Platform available to respond and meet the needs of users in a timely manner	Platform available to develops plans with reasonable pricing based on the user's health status and needs	The intelligent medical and nursing equipment with simple interface, easy to learn and operate, time-saving
With electronic health records, platform supports users to make online consultation, appointment, consultation and feedback	1	1	1	3	3	5	1
Intelligent monitoring and sensing devices available to accurately monitoring the user's health indicators in real time and effectively warn of health hazards	1	1	0.333333	3	1	1	1
Services provided by professional staff, available to effective diagnostic treatment, rehabilitation care, and make adjustments to feedback	1	3	1	3	1	5	3
Platform, system focus on user privacy protection	0.333333	0.333333	0.333333	1	0.333333	0.2	0.333333		Expert7
Platform available to respond and meet the needs of users in a timely manner	0.333333	1	1	3	1	1	0.333333
Platform available to develops plans with reasonable pricing based on the user's health status and needs	0.2	1	0.2	5	1	1	1
The intelligent medical and nursing equipment with simple interface, easy to learn and operate, time-saving	1	1	0.333333	3	3	1	1
index	With electronic health records, platform supports users to make online consultation, appointment, consultation and feedback	Intelligent monitoring and sensing devices available to accurately monitoring the user's health indicators in real time and effectively warn of health hazards	Services provided by professional staff, available to effective diagnostic treatment, rehabilitation care, and make adjustments to feedback	Platform, system focus on user privacy protection	Platform available to respond and meet the needs of users in a timely manner	Platform available to develops plans with reasonable pricing based on the user's health status and needs	The intelligent medical and nursing equipment with simple interface, easy to learn and operate, time-saving
With electronic health records, platform supports users to make online consultation, appointment, consultation and feedback	1	0.333333	0.2	1	0.333333	0.2	0.125
Intelligent monitoring and sensing devices available to accurately monitoring the user's health indicators in real time and effectively warn of health hazards	3	1	0.5	3	1	0.333333	0.142857
Services provided by professional staff, available to effective diagnostic treatment, rehabilitation care, and make adjustments to feedback	5	2	1	5	3	1	0.2
Platform, system focus on user privacy protection	1	0.333333	0.2	1	0.333333	0.333333	0.125		Expert8
Platform available to respond and meet the needs of users in a timely manner	3	1	0.333333	3	1	0.333333	0.2
Platform available to develops plans with reasonable pricing based on the user's health status and needs	5	3	1	3	3	1	0.25
The intelligent medical and nursing equipment with simple interface, easy to learn and operate, time-saving	8	7	5	8	5	4	1
index	With electronic health records, platform supports users to make online consultation, appointment, consultation and feedback	Intelligent monitoring and sensing devices available to accurately monitoring the user's health indicators in real time and effectively warn of health hazards	Services provided by professional staff, available to effective diagnostic treatment, rehabilitation care, and make adjustments to feedback	Platform, system focus on user privacy protection	Platform available to respond and meet the needs of users in a timely manner	Platform available to develops plans with reasonable pricing based on the user's health status and needs	The intelligent medical and nursing equipment with simple interface, easy to learn and operate, time-saving
With electronic health records, platform supports users to make online consultation, appointment, consultation and feedback	1	1	7	1	1	1	1
Intelligent monitoring and sensing devices available to accurately monitoring the user's health indicators in real time and effectively warn of health hazards	1	1	7	1	1	1	7
Services provided by professional staff, available to effective diagnostic treatment, rehabilitation care, and make adjustments to feedback	0.142857	0.142857	1	1	1	9	9		Expert9
Platform, system focus on user privacy protection	1	1	1	1	1	1	1
Platform available to respond and meet the needs of users in a timely manner	1	1	1	1	1	1	1
Platform available to develops plans with reasonable pricing based on the user's health status and needs	1	1	0.111111	1	1	1	1
The intelligent medical and nursing equipment with simple interface, easy to learn and operate, time-saving	1	0.142857	0.111111	1	1	1	1
index	With electronic health records, platform supports users to make online consultation, appointment, consultation and feedback	Intelligent monitoring and sensing devices available to accurately monitoring the user's health indicators in real time and effectively warn of health hazards	Services provided by professional staff, available to effective diagnostic treatment, rehabilitation care, and make adjustments to feedback	Platform, system focus on user privacy protection	Platform available to respond and meet the needs of users in a timely manner	Platform available to develops plans with reasonable pricing based on the user's health status and needs	The intelligent medical and nursing equipment with simple interface, easy to learn and operate, time-saving
With electronic health records, platform supports users to make online consultation, appointment, consultation and feedback	1	0.142857	0.2	3	9	0.333333	0.2		Expert10
Intelligent monitoring and sensing devices available to accurately monitoring the user's health indicators in real time and effectively warn of health hazards	7	1	5	7	3	5	3
Services provided by professional staff, available to effective diagnostic treatment, rehabilitation care, and make adjustments to feedback	5	0.2	1	7	3	0.333333	3
Platform, system focus on user privacy protection	0.333333	0.142857	0.142857	1	0.111111	0.142857	0.142857
Platform available to respond and meet the needs of users in a timely manner	0.111111	0.333333	0.333333	9	1	0.333333	1
Platform available to develops plans with reasonable pricing based on the user's health status and needs	3	0.2	3	7	3	1	0.2
The intelligent medical and nursing equipment with simple interface, easy to learn and operate, time-saving	5	0.333333	0.333333	7	1	5	1
index	With electronic health records, platform supports users to make online consultation, appointment, consultation and feedback	Intelligent monitoring and sensing devices available to accurately monitoring the user's health indicators in real time and effectively warn of health hazards	Services provided by professional staff, available to effective diagnostic treatment, rehabilitation care, and make adjustments to feedback	Platform, system focus on user privacy protection	Platform available to respond and meet the needs of users in a timely manner	Platform available to develops plans with reasonable pricing based on the user's health status and needs	The intelligent medical and nursing equipment with simple interface, easy to learn and operate, time-saving
With electronic health records, platform supports users to make online consultation, appointment, consultation and feedback	1	1	1	3	3	1	3
Intelligent monitoring and sensing devices available to accurately monitoring the user's health indicators in real time and effectively warn of health hazards	1	1	1	1	3	3	1
Services provided by professional staff, available to effective diagnostic treatment, rehabilitation care, and make adjustments to feedback	1	1	1	3	1	3	1
Platform, system focus on user privacy protection	0.333333	1	0.333333	1	1	0.333333	0.333333		Expert11
Platform available to respond and meet the needs of users in a timely manner	0.333333	0.333333	1	1	1	1	1
Platform available to develops plans with reasonable pricing based on the user's health status and needs	1	0.333333	0.333333	3	1	1	1
The intelligent medical and nursing equipment with simple interface, easy to learn and operate, time-saving	0.333333	1	1	3	1	1	1
index	With electronic health records, platform supports users to make online consultation, appointment, consultation and feedback	Intelligent monitoring and sensing devices available to accurately monitoring the user's health indicators in real time and effectively warn of health hazards	Services provided by professional staff, available to effective diagnostic treatment, rehabilitation care, and make adjustments to feedback	Platform, system focus on user privacy protection	Platform available to respond and meet the needs of users in a timely manner	Platform available to develops plans with reasonable pricing based on the user's health status and needs	The intelligent medical and nursing equipment with simple interface, easy to learn and operate, time-saving
With electronic health records, platform supports users to make online consultation, appointment, consultation and feedback	1	3	1	3	1	3	1
Intelligent monitoring and sensing devices available to accurately monitoring the user's health indicators in real time and effectively warn of health hazards	0.333333	1	1	1	1	3	1
Services provided by professional staff, available to effective diagnostic treatment, rehabilitation care, and make adjustments to feedback	1	1	1	3	1	3	1
Platform, system focus on user privacy protection	0.333333	1	0.333333	1	1	1	1
Platform available to respond and meet the needs of users in a timely manner	1	1	1	1	1	3	1		Expert12
Platform available to develops plans with reasonable pricing based on the user's health status and needs	0.333333	0.333333	0.333333	1	0.333333	1	1
The intelligent medical and nursing equipment with simple interface, easy to learn and operate, time-saving	1	1	1	1	1	1	1
index	With electronic health records, platform supports users to make online consultation, appointment, consultation and feedback	Intelligent monitoring and sensing devices available to accurately monitoring the user's health indicators in real time and effectively warn of health hazards	Services provided by professional staff, available to effective diagnostic treatment, rehabilitation care, and make adjustments to feedback	Platform, system focus on user privacy protection	Platform available to respond and meet the needs of users in a timely manner	Platform available to develops plans with reasonable pricing based on the user's health status and needs	The intelligent medical and nursing equipment with simple interface, easy to learn and operate, time-saving
With electronic health records, platform supports users to make online consultation, appointment, consultation and feedback	1	1	1	1	1	1	1
Intelligent monitoring and sensing devices available to accurately monitoring the user's health indicators in real time and effectively warn of health hazards	1	1	1	1	1	1	1
Services provided by professional staff, available to effective diagnostic treatment, rehabilitation care, and make adjustments to feedback	1	1	1	1	1	1	1
Platform, system focus on user privacy protection	1	1	1	1	1	1	1		Expert13
Platform available to respond and meet the needs of users in a timely manner	1	1	1	1	1	1	1
Platform available to develops plans with reasonable pricing based on the user's health status and needs	1	1	1	1	1	1	1
The intelligent medical and nursing equipment with simple interface, easy to learn and operate, time-saving	1	1	1	1	1	1	1
index	With electronic health records, platform supports users to make online consultation, appointment, consultation and feedback	Intelligent monitoring and sensing devices available to accurately monitoring the user's health indicators in real time and effectively warn of health hazards	Services provided by professional staff, available to effective diagnostic treatment, rehabilitation care, and make adjustments to feedback	Platform, system focus on user privacy protection	Platform available to respond and meet the needs of users in a timely manner	Platform available to develops plans with reasonable pricing based on the user's health status and needs	The intelligent medical and nursing equipment with simple interface, easy to learn and operate, time-saving
With electronic health records, platform supports users to make online consultation, appointment, consultation and feedback	1	0.333333	0.333333	3	0.2	3	5
Intelligent monitoring and sensing devices available to accurately monitoring the user's health indicators in real time and effectively warn of health hazards	3	1	0.333333	3	0.2	3	5
Services provided by professional staff, available to effective diagnostic treatment, rehabilitation care, and make adjustments to feedback	3	3	1	3	0.2	3	5
Platform, system focus on user privacy protection	0.333333	0.333333	0.333333	1	3	1	5		Expert14
Platform available to respond and meet the needs of users in a timely manner	5	5	5	0.333333	1	3	5
Platform available to develops plans with reasonable pricing based on the user's health status and needs	0.333333	0.333333	0.333333	1	0.333333	1	5
The intelligent medical and nursing equipment with simple interface, easy to learn and operate, time-saving	0.2	0.2	0.2	0.2	0.2	0.2	1
index	With electronic health records, platform supports users to make online consultation, appointment, consultation and feedback	Intelligent monitoring and sensing devices available to accurately monitoring the user's health indicators in real time and effectively warn of health hazards	Services provided by professional staff, available to effective diagnostic treatment, rehabilitation care, and make adjustments to feedback	Platform, system focus on user privacy protection	Platform available to respond and meet the needs of users in a timely manner	Platform available to develops plans with reasonable pricing based on the user's health status and needs	The intelligent medical and nursing equipment with simple interface, easy to learn and operate, time-saving
With electronic health records, platform supports users to make online consultation, appointment, consultation and feedback	1	7	0.2	0.2	5	3	0.333333
Intelligent monitoring and sensing devices available to accurately monitoring the user's health indicators in real time and effectively warn of health hazards	0.142857	1	0.142857	0.142857	0.2	0.2	0.142857
Services provided by professional staff, available to effective diagnostic treatment, rehabilitation care, and make adjustments to feedback	5	7	1	0.333333	5	3	0.333333		Expert15
Platform, system focus on user privacy protection	5	7	3	1	7	5	3
Platform available to respond and meet the needs of users in a timely manner	0.2	5	0.2	0.142857	1	3	0.2
Platform available to develops plans with reasonable pricing based on the user's health status and needs	0.333333	5	0.333333	0.2	0.333333	1	0.142857
The intelligent medical and nursing equipment with simple interface, easy to learn and operate, time-saving	3	7	3	0.333333	5	7	1
