# Supplementary material for: A study on the quality evaluation index system of smart home care for older adults in the community ——based on Delphi and AHP
Source: BMC Public Health. 2023 Mar 1;23:411. doi: 10.1186/s12889-023-15262-1 (PMC9975439; doi:10.1186/s12889-023-15262-1)
Supplement: Supplementary file 3 — Additional file 3. Judgement Matrix of smart emergency assistance. [file 12889_2023_15262_MOESM3_ESM.xlsx]

## Sheet: Sheet1
index	Equipped with professional emergency assistance and intelligent monitoring equipment	Timely and accurate positioning to obtain good results (basically zero accidents) and making adjustments to feedback	Platform and the user's children are interconnected and shared to ensure peace of mind	Platform ,system and equipment focus on user privacy protection	Responding to emergency needs in a timely manner, ability to quickly locating the source of danger and resolve it	Available to develops and prices plans based on advance insights into the user's actual situation and offer special services	The emergency equipment with simple interface, easy to learn and operate, time-saving
Equipped with professional emergency assistance and intelligent monitoring equipment	1	1	3	0.5	0.25	8	4
Timely and accurate positioning to obtain good results (basically zero accidents) and making adjustments to feedback	1	1	5	0.5	1	8	3
Platform ,system and equipment focus on user privacy protection	0.333333	0.2	1	0.2	0.166667	7	2
Platform ,system and equipment focus on user privacy protection	2	2	5	1	2	9	7	Expert1
Responding to emergency needs in a timely manner, ability to quickly locating the source of danger and resolve it	4	1	6	0.5	1	4	5
Available to develops and prices plans based on advance insights into the user's actual situation and offer special services	0.125	0.125	0.142857	0.111111	0.25	1	0.333333
The emergency equipment with simple interface, easy to learn and operate, time-saving	0.25	0.333333	0.5	0.142857	0.2	3	1
index	Equipped with professional emergency assistance and intelligent monitoring equipment	Timely and accurate positioning to obtain good results (basically zero accidents) and making adjustments to feedback	Platform and the user's children are interconnected and shared to ensure peace of mind	Platform ,system and equipment focus on user privacy protection	Responding to emergency needs in a timely manner, ability to quickly locating the source of danger and resolve it	Available to develops and prices plans based on advance insights into the user's actual situation and offer special services	The emergency equipment with simple interface, easy to learn and operate, time-saving
Equipped with professional emergency assistance and intelligent monitoring equipment	1	5	3	3	1	1	3
Timely and accurate positioning to obtain good results (basically zero accidents) and making adjustments to feedback	0.2	1	1	5	0.5	0.333333	5
Platform and the user's children are interconnected and shared to ensure peace of mind	0.333333	1	1	1	0.5	0.333333	0.5
Platform ,system and equipment focus on user privacy protection	0.333333	0.2	1	1	0.333333	0.2	0.5
Responding to emergency needs in a timely manner, ability to quickly locating the source of danger and resolve it	1	2	2	3	1	1	7	Expert2
Available to develops and prices plans based on advance insights into the user's actual situation and offer special services	1	3	3	5	1	1	5
The emergency equipment with simple interface, easy to learn and operate, time-saving	0.333333	0.2	2	2	0.142857	0.2	1
index	Equipped with professional emergency assistance and intelligent monitoring equipment	Timely and accurate positioning to obtain good results (basically zero accidents) and making adjustments to feedback	Platform and the user's children are interconnected and shared to ensure peace of mind	Platform ,system and equipment focus on user privacy protection	Responding to emergency needs in a timely manner, ability to quickly locating the source of danger and resolve it	Available to develops and prices plans based on advance insights into the user's actual situation and offer special services	The emergency equipment with simple interface, easy to learn and operate, time-saving
Equipped with professional emergency assistance and intelligent monitoring equipment	1	1	1	0.333333	1	1	7
Timely and accurate positioning to obtain good results (basically zero accidents) and making adjustments to feedback	1	1	1	0.333333	1	1	5
Platform and the user's children are interconnected and shared to ensure peace of mind	1	1	1	0.333333	1	1	7
Platform ,system and equipment focus on user privacy protection	3	3	3	1	0.2	0.2	1
Responding to emergency needs in a timely manner, ability to quickly locating the source of danger and resolve it	1	1	1	5	1	1	5	Expert3
Available to develops and prices plans based on advance insights into the user's actual situation and offer special services	1	1	1	5	1	1	3
The emergency equipment with simple interface, easy to learn and operate, time-saving	0.142857	0.2	0.142857	1	0.2	0.333333	1
index	Equipped with professional emergency assistance and intelligent monitoring equipment	Timely and accurate positioning to obtain good results (basically zero accidents) and making adjustments to feedback	Platform and the user's children are interconnected and shared to ensure peace of mind	Platform ,system and equipment focus on user privacy protection	Responding to emergency needs in a timely manner, ability to quickly locating the source of danger and resolve it	Available to develops and prices plans based on advance insights into the user's actual situation and offer special services	The emergency equipment with simple interface, easy to learn and operate, time-saving
Equipped with professional emergency assistance and intelligent monitoring equipment	1	0.25	3	7	0.142857	5	0.5
Timely and accurate positioning to obtain good results (basically zero accidents) and making adjustments to feedback	4	1	3	7	0.166667	5	2
Platform and the user's children are interconnected and shared to ensure peace of mind	0.333333	0.333333	1	3	0.142857	3	0.5
Platform ,system and equipment focus on user privacy protection	0.142857	0.142857	0.333333	1	0.111111	0.333333	0.25
Responding to emergency needs in a timely manner, ability to quickly locating the source of danger and resolve it	7	6	7	9	1	8	4	Expert4
Available to develops and prices plans based on advance insights into the user's actual situation and offer special services	0.2	0.2	0.333333	3	0.125	1	0.25
The emergency equipment with simple interface, easy to learn and operate, time-saving	2	0.5	2	4	0.25	4	1
index	Equipped with professional emergency assistance and intelligent monitoring equipment	Timely and accurate positioning to obtain good results (basically zero accidents) and making adjustments to feedback	Platform and the user's children are interconnected and shared to ensure peace of mind	Platform ,system and equipment focus on user privacy protection	Responding to emergency needs in a timely manner, ability to quickly locating the source of danger and resolve it	Available to develops and prices plans based on advance insights into the user's actual situation and offer special services	The emergency equipment with simple interface, easy to learn and operate, time-saving
Equipped with professional emergency assistance and intelligent monitoring equipment	1	1	1	3	0.333333	1	0.333333
Timely and accurate positioning to obtain good results (basically zero accidents) and making adjustments to feedback	1	1	3	3	1	3	2
Platform and the user's children are interconnected and shared to ensure peace of mind	1	0.333333	1	3	0.333333	1	1
Platform ,system and equipment focus on user privacy protection	0.333333	0.333333	0.333333	1	0.333333	1	0.2
Responding to emergency needs in a timely manner, ability to quickly locating the source of danger and resolve it	3	1	3	3	1	5	5	Expert5
Available to develops and prices plans based on advance insights into the user's actual situation and offer special services	1	0.333333	1	1	0.2	1	0.333333
The emergency equipment with simple interface, easy to learn and operate, time-saving	3	0.5	1	5	0.2	3	1
index	Equipped with professional emergency assistance and intelligent monitoring equipment	Timely and accurate positioning to obtain good results (basically zero accidents) and making adjustments to feedback	Platform and the user's children are interconnected and shared to ensure peace of mind	Platform ,system and equipment focus on user privacy protection	Responding to emergency needs in a timely manner, ability to quickly locating the source of danger and resolve it	Available to develops and prices plans based on advance insights into the user's actual situation and offer special services	The emergency equipment with simple interface, easy to learn and operate, time-saving
Equipped with professional emergency assistance and intelligent monitoring equipment	1	1	0.333333	1	1	0.142857	7
Timely and accurate positioning to obtain good results (basically zero accidents) and making adjustments to feedback	1	1	0.333333	1	1	0.142857	7
Platform and the user's children are interconnected and shared to ensure peace of mind	3	3	1	0.333333	0.333333	1	1
Platform ,system and equipment focus on user privacy protection	1	1	3	1	0.142857	0.2	7
Responding to emergency needs in a timely manner, ability to quickly locating the source of danger and resolve it	1	1	3	7	1	9	9	Expert6
Available to develops and prices plans based on advance insights into the user's actual situation and offer special services	7	7	1	5	0.111111	1	5
The emergency equipment with simple interface, easy to learn and operate, time-saving	0.142857	0.142857	1	0.142857	0.111111	0.2	1
index	Equipped with professional emergency assistance and intelligent monitoring equipment	Timely and accurate positioning to obtain good results (basically zero accidents) and making adjustments to feedback	Platform and the user's children are interconnected and shared to ensure peace of mind	Platform ,system and equipment focus on user privacy protection	Responding to emergency needs in a timely manner, ability to quickly locating the source of danger and resolve it	Available to develops and prices plans based on advance insights into the user's actual situation and offer special services	The emergency equipment with simple interface, easy to learn and operate, time-saving
Equipped with professional emergency assistance and intelligent monitoring equipment	1	1	1	5	1	3	3
Timely and accurate positioning to obtain good results (basically zero accidents) and making adjustments to feedback	1	1	1	5	1	3	3
Platform and the user's children are interconnected and shared to ensure peace of mind	1	1	1	3	1	1	1
Platform ,system and equipment focus on user privacy protection	0.2	0.2	0.333333	1	0.333333	0.333333	0.333333
Responding to emergency needs in a timely manner, ability to quickly locating the source of danger and resolve it	1	1	1	3	1	1	1	Expert7
Available to develops and prices plans based on advance insights into the user's actual situation and offer special services	0.333333	0.333333	1	3	1	1	1
The emergency equipment with simple interface, easy to learn and operate, time-saving	0.333333	0.333333	1	3	1	1	1
index	Equipped with professional emergency assistance and intelligent monitoring equipment	Timely and accurate positioning to obtain good results (basically zero accidents) and making adjustments to feedback	Platform and the user's children are interconnected and shared to ensure peace of mind	Platform ,system and equipment focus on user privacy protection	Responding to emergency needs in a timely manner, ability to quickly locating the source of danger and resolve it	Available to develops and prices plans based on advance insights into the user's actual situation and offer special services	The emergency equipment with simple interface, easy to learn and operate, time-saving
Equipped with professional emergency assistance and intelligent monitoring equipment	1	0.5	0.333333	1	0.2	0.2	0.111111
Timely and accurate positioning to obtain good results (basically zero accidents) and making adjustments to feedback	2	1	0.5	3	0.333333	0.333333	0.125
Platform and the user's children are interconnected and shared to ensure peace of mind	3	2	1	3	0.5	0.333333	0.166667
Platform ,system and equipment focus on user privacy protection	1	0.333333	0.333333	1	0.2	0.2	0.111111
Responding to emergency needs in a timely manner, ability to quickly locating the source of danger and resolve it	5	3	2	5	1	1	0.2	Expert8
Available to develops and prices plans based on advance insights into the user's actual situation and offer special services	5	3	3	5	1	1	0.2
The emergency equipment with simple interface, easy to learn and operate, time-saving	9	8	6	9	5	5	1
index	Equipped with professional emergency assistance and intelligent monitoring equipment	Timely and accurate positioning to obtain good results (basically zero accidents) and making adjustments to feedback	Platform and the user's children are interconnected and shared to ensure peace of mind	Platform ,system and equipment focus on user privacy protection	Responding to emergency needs in a timely manner, ability to quickly locating the source of danger and resolve it	Available to develops and prices plans based on advance insights into the user's actual situation and offer special services	The emergency equipment with simple interface, easy to learn and operate, time-saving
Equipped with professional emergency assistance and intelligent monitoring equipment	1	1	1	1	1	1	1
Timely and accurate positioning to obtain good results (basically zero accidents) and making adjustments to feedback	1	1	0.333333	1	7	7	7
Platform and the user's children are interconnected and shared to ensure peace of mind	1	3	1	1	1	1	1	Expert9
Platform ,system and equipment focus on user privacy protection	1	1	1	1	1	1	1
Responding to emergency needs in a timely manner, ability to quickly locating the source of danger and resolve it	1	0.142857	1	1	1	1	1
Available to develops and prices plans based on advance insights into the user's actual situation and offer special services	1	0.142857	1	1	1	1	1
The emergency equipment with simple interface, easy to learn and operate, time-saving	1	0.142857	1	1	1	1	1
index	Equipped with professional emergency assistance and intelligent monitoring equipment	Timely and accurate positioning to obtain good results (basically zero accidents) and making adjustments to feedback	Platform and the user's children are interconnected and shared to ensure peace of mind	Platform ,system and equipment focus on user privacy protection	Responding to emergency needs in a timely manner, ability to quickly locating the source of danger and resolve it	Available to develops and prices plans based on advance insights into the user's actual situation and offer special services	The emergency equipment with simple interface, easy to learn and operate, time-saving
Equipped with professional emergency assistance and intelligent monitoring equipment	1	0.2	0.142857	3	0.2	3	0.333333
Timely and accurate positioning to obtain good results (basically zero accidents) and making adjustments to feedback	5	1	0.333333	5	0.2	0.333333	3
Platform and the user's children are interconnected and shared to ensure peace of mind	7	3	1	7	5	3	3
Platform ,system and equipment focus on user privacy protection	0.333333	0.2	0.142857	1	0.2	0.2	0.2	Expert10
Responding to emergency needs in a timely manner, ability to quickly locating the source of danger and resolve it	5	5	0.2	5	1	3	0.333333
Available to develops and prices plans based on advance insights into the user's actual situation and offer special services	0.333333	3	0.333333	5	0.333333	1	0.333333
The emergency equipment with simple interface, easy to learn and operate, time-saving	3	0.333333	0.333333	5	3	3	1
index	Equipped with professional emergency assistance and intelligent monitoring equipment	Timely and accurate positioning to obtain good results (basically zero accidents) and making adjustments to feedback	Platform and the user's children are interconnected and shared to ensure peace of mind	Platform ,system and equipment focus on user privacy protection	Responding to emergency needs in a timely manner, ability to quickly locating the source of danger and resolve it	Available to develops and prices plans based on advance insights into the user's actual situation and offer special services	The emergency equipment with simple interface, easy to learn and operate, time-saving
Equipped with professional emergency assistance and intelligent monitoring equipment	1	1	1	3	3	3	1
Timely and accurate positioning to obtain good results (basically zero accidents) and making adjustments to feedback	1	1	1	3	1	3	1
Platform and the user's children are interconnected and shared to ensure peace of mind	1	1	1	1	1	1	1
Platform ,system and equipment focus on user privacy protection	0.333333	0.333333	1	1	1	1	1	Expert11
Responding to emergency needs in a timely manner, ability to quickly locating the source of danger and resolve it	0.333333	1	1	1	1	1	1
Available to develops and prices plans based on advance insights into the user's actual situation and offer special services	0.333333	0.333333	1	1	1	1	1
The emergency equipment with simple interface, easy to learn and operate, time-saving	1	1	1	1	1	1	1
index	Equipped with professional emergency assistance and intelligent monitoring equipment	Timely and accurate positioning to obtain good results (basically zero accidents) and making adjustments to feedback	Platform and the user's children are interconnected and shared to ensure peace of mind	Platform ,system and equipment focus on user privacy protection	Responding to emergency needs in a timely manner, ability to quickly locating the source of danger and resolve it	Available to develops and prices plans based on advance insights into the user's actual situation and offer special services	The emergency equipment with simple interface, easy to learn and operate, time-saving
Equipped with professional emergency assistance and intelligent monitoring equipment	1	1	1	1	1	3	1
Timely and accurate positioning to obtain good results (basically zero accidents) and making adjustments to feedback	1	1	1	1	1	1	1
Platform and the user's children are interconnected and shared to ensure peace of mind	1	1	1	1	0.333333	3	1
Platform ,system and equipment focus on user privacy protection	1	1	1	1	0.333333	1	1	Expert12
Responding to emergency needs in a timely manner, ability to quickly locating the source of danger and resolve it	1	1	3	3	1	5	1
Available to develops and prices plans based on advance insights into the user's actual situation and offer special services	0.333333	1	0.333333	1	0.2	1	1
The emergency equipment with simple interface, easy to learn and operate, time-saving	1	1	1	1	1	1	1
index	Equipped with professional emergency assistance and intelligent monitoring equipment	Timely and accurate positioning to obtain good results (basically zero accidents) and making adjustments to feedback	Platform and the user's children are interconnected and shared to ensure peace of mind	Platform ,system and equipment focus on user privacy protection	Responding to emergency needs in a timely manner, ability to quickly locating the source of danger and resolve it	Available to develops and prices plans based on advance insights into the user's actual situation and offer special services	The emergency equipment with simple interface, easy to learn and operate, time-saving
Equipped with professional emergency assistance and intelligent monitoring equipment	1	1	1	1	1	1	1
Timely and accurate positioning to obtain good results (basically zero accidents) and making adjustments to feedback	1	1	1	1	1	1	1
Platform and the user's children are interconnected and shared to ensure peace of mind	1	1	1	1	1	1	1
Platform ,system and equipment focus on user privacy protection	1	1	1	1	1	1	1	Expert13
Responding to emergency needs in a timely manner, ability to quickly locating the source of danger and resolve it	1	1	1	1	1	1	1							c
Available to develops and prices plans based on advance insights into the user's actual situation and offer special services	1	1	1	1	1	1	1
The emergency equipment with simple interface, easy to learn and operate, time-saving	1	1	1	1	1	1	1
index	Equipped with professional emergency assistance and intelligent monitoring equipment	Timely and accurate positioning to obtain good results (basically zero accidents) and making adjustments to feedback	Platform and the user's children are interconnected and shared to ensure peace of mind	Platform ,system and equipment focus on user privacy protection	Responding to emergency needs in a timely manner, ability to quickly locating the source of danger and resolve it	Available to develops and prices plans based on advance insights into the user's actual situation and offer special services	The emergency equipment with simple interface, easy to learn and operate, time-saving
Equipped with professional emergency assistance and intelligent monitoring equipment	1	0.2	0.333333	3	0.333333	3	3
Timely and accurate positioning to obtain good results (basically zero accidents) and making adjustments to feedback	5	1	0.333333	3	0.333333	3	3
Platform and the user's children are interconnected and shared to ensure peace of mind	3	3	1	3	0.333333	3	3
Platform ,system and equipment focus on user privacy protection	0.333333	0.333333	0.333333	1	3	3	3
Responding to emergency needs in a timely manner, ability to quickly locating the source of danger and resolve it	3	3	3	0.333333	1	3	3	Expert14
Available to develops and prices plans based on advance insights into the user's actual situation and offer special services	0.333333	0.333333	0.333333	0.333333	0.333333	1	1
The emergency equipment with simple interface, easy to learn and operate, time-saving	0.333333	0.333333	0.333333	0.333333	0.333333	1	1
index	Equipped with professional emergency assistance and intelligent monitoring equipment	Timely and accurate positioning to obtain good results (basically zero accidents) and making adjustments to feedback	Platform and the user's children are interconnected and shared to ensure peace of mind	Platform ,system and equipment focus on user privacy protection	Responding to emergency needs in a timely manner, ability to quickly locating the source of danger and resolve it	Available to develops and prices plans based on advance insights into the user's actual situation and offer special services	The emergency equipment with simple interface, easy to learn and operate, time-saving
Equipped with professional emergency assistance and intelligent monitoring equipment	1	0.142857	0.333333	2	0.142857	3	0.333333
Timely and accurate positioning to obtain good results (basically zero accidents) and making adjustments to feedback	7	1	5	3	2	7	2
Platform and the user's children are interconnected and shared to ensure peace of mind	3	0.2	1	3	0.2	2	0.2
Platform ,system and equipment focus on user privacy protection	0.5	0.333333	0.333333	1	0.2	2	0.2
Responding to emergency needs in a timely manner, ability to quickly locating the source of danger and resolve it	7	0.5	5	5	1	5	3	Expert15
Available to develops and prices plans based on advance insights into the user's actual situation and offer special services	0.333333	0.142857	0.5	0.5	0.2	1	0.333333
The emergency equipment with simple interface, easy to learn and operate, time-saving	3	0.5	5	5	0.333333	3	1
