# Supplementary material for: A study on the quality evaluation index system of smart home care for older adults in the community ——based on Delphi and AHP
Source: BMC Public Health. 2023 Mar 1;23:411. doi: 10.1186/s12889-023-15262-1 (PMC9975439; doi:10.1186/s12889-023-15262-1)
Supplement: Supplementary file 4 — Additional file 4. Judgement Matrix of smart cleaning assistance. [file 12889_2023_15262_MOESM4_ESM.xlsx]

## Sheet: Sheet1
index	Platform supports phone or online ordering and feedback	Platform available to provide clean and tidy services to customers and make adjustments to feedback	Platform and system focus on user privacy protection	Platform available to provide services at the scheduled time	Platform available to offer different types of service packages and pricing based on user's needs and preferences	The system with simple interface, easy to learn and operate, time-saving
Platform supports phone or online ordering and feedback	1	2	0.333333	0.5	5	2
Platform available to provide clean and tidy services to customers and make adjustments to feedback	0.5	1	0.2	2	3	0.5
Platform and system focus on user privacy protection	3	5	1	8	6	5		Expert1
Platform available to provide services at the scheduled time	2	0.5	0.125	1	4	1
Platform available to offer different types of service packages and pricing based on user's needs and preferences	0.2	0.333333	0.166667	0.25	1	1
The system with simple interface, easy to learn and operate, time-saving	0.5	2	0.2	1	1	1
index	Platform supports phone or online ordering and feedback	Platform available to provide clean and tidy services to customers and make adjustments to feedback	Platform and system focus on user privacy protection	Platform available to provide services at the scheduled time	Platform available to offer different types of service packages and pricing based on user's needs and preferences	The system with simple interface, easy to learn and operate, time-saving
Platform supports phone or online ordering and feedback	1	0.2	1	0.333333	1	1
Platform available to provide clean and tidy services to customers and make adjustments to feedback	5	1	5	3	3	3		Expert2
Platform and system focus on user privacy protection	1	0.2	1	0.333333	0.2	0.2
Platform available to provide services at the scheduled time	3	0.333333	3	1	3	3
Platform available to offer different types of service packages and pricing based on user's needs and preferences	1	0.333333	5	0.333333	1	5
The system with simple interface, easy to learn and operate, time-saving	1	0.333333	5	0.333333	0.2	1
index	Platform supports phone or online ordering and feedback	Platform available to provide clean and tidy services to customers and make adjustments to feedback	Platform and system focus on user privacy protection	Platform available to provide services at the scheduled time	Platform available to offer different types of service packages and pricing based on user's needs and preferences	The system with simple interface, easy to learn and operate, time-saving
Platform supports phone or online ordering and feedback	1	1	7	1	7	7
Platform available to provide clean and tidy services to customers and make adjustments to feedback	1	1	9	1	9	9
Platform and system focus on user privacy protection	0.142857	0.111111	1	0.2	1	1		Expert3
Platform available to provide services at the scheduled time	1	1	5	1	7	7
Platform available to offer different types of service packages and pricing based on user's needs and preferences	0.142857	0.111111	1	0.142857	1	3
The system with simple interface, easy to learn and operate, time-saving	0.142857	0.111111	1	0.142857	0.333333	1
index	Platform supports phone or online ordering and feedback	Platform available to provide clean and tidy services to customers and make adjustments to feedback	Platform and system focus on user privacy protection	Platform available to provide services at the scheduled time	Platform available to offer different types of service packages and pricing based on user's needs and preferences	The system with simple interface, easy to learn and operate, time-saving
Platform supports phone or online ordering and feedback	1	5	7	1	1	1
Platform available to provide clean and tidy services to customers and make adjustments to feedback	0.2	1	9	1	6	2		Expert4
Platform and system focus on user privacy protection	0.142857	0.111111	1	0.333333	0.333333	0.333333
Platform available to provide services at the scheduled time	1	1	3	1	3	1
Platform available to offer different types of service packages and pricing based on user's needs and preferences	1	0.166667	3	0.333333	1	0.333333
The system with simple interface, easy to learn and operate, time-saving	1	0.5	3	1	3	1
index	Platform supports phone or online ordering and feedback	Platform available to provide clean and tidy services to customers and make adjustments to feedback	Platform and system focus on user privacy protection	Platform available to provide services at the scheduled time	Platform available to offer different types of service packages and pricing based on user's needs and preferences	The system with simple interface, easy to learn and operate, time-saving
Platform supports phone or online ordering and feedback	1	5	7	1	1	1
Platform available to provide clean and tidy services to customers and make adjustments to feedback	0.2	1	9	1	6	2
Platform and system focus on user privacy protection	0.142857	0.111111	1	0.333333	0.333333	0.333333		Expert5
Platform available to provide services at the scheduled time	1	1	3	1	3	1
Platform available to offer different types of service packages and pricing based on user's needs and preferences	1	0.166667	3	0.333333	1	0.333333
The system with simple interface, easy to learn and operate, time-saving	1	0.5	3	1	3	1
index	Platform supports phone or online ordering and feedback	Platform available to provide clean and tidy services to customers and make adjustments to feedback	Platform and system focus on user privacy protection	Platform available to provide services at the scheduled time	Platform available to offer different types of service packages and pricing based on user's needs and preferences	The system with simple interface, easy to learn and operate, time-saving
Platform supports phone or online ordering and feedback	1	0.333333	1	0.333333	0.142857	1
Platform available to provide clean and tidy services to customers and make adjustments to feedback	3	1	1	7	3	7
Platform and system focus on user privacy protection	1	1	1	7	3	7
Platform available to provide services at the scheduled time	3	0.142857	0.142857	1	0.333333	5		Expert6
Platform available to offer different types of service packages and pricing based on user's needs and preferences	7	0.333333	0.333333	3	1	5
The system with simple interface, easy to learn and operate, time-saving	1	0.142857	0.142857	0.2	0.2	1
index	Platform supports phone or online ordering and feedback	Platform available to provide clean and tidy services to customers and make adjustments to feedback	Platform and system focus on user privacy protection	Platform available to provide services at the scheduled time	Platform available to offer different types of service packages and pricing based on user's needs and preferences	The system with simple interface, easy to learn and operate, time-saving
Platform supports phone or online ordering and feedback	1	1	3	1	3	1
Platform available to provide clean and tidy services to customers and make adjustments to feedback	1	1	3	1	1	0.333333
Platform and system focus on user privacy protection	0.333333	0.333333	1	0.2	0.333333	0.2
Platform available to provide services at the scheduled time	1	1	5	1	5	3		Expert7
Platform available to offer different types of service packages and pricing based on user's needs and preferences	0.333333	1	3	0.2	1	1
The system with simple interface, easy to learn and operate, time-saving	1	3	5	0.333333	1	1
index	Platform supports phone or online ordering and feedback	Platform available to provide clean and tidy services to customers and make adjustments to feedback	Platform and system focus on user privacy protection	Platform available to provide services at the scheduled time	Platform available to offer different types of service packages and pricing based on user's needs and preferences	The system with simple interface, easy to learn and operate, time-saving
Platform supports phone or online ordering and feedback	1	1	1	0.5	0.2	0.111111
Platform available to provide clean and tidy services to customers and make adjustments to feedback	1	1	1	0.5	0.5	0.111111
Platform and system focus on user privacy protection	1	1	1	1	0.5	0.125
Platform available to provide services at the scheduled time	2	2	1	1	0.2	0.111111		Expert8
Platform available to offer different types of service packages and pricing based on user's needs and preferences	5	2	2	5	1	0.142857
The system with simple interface, easy to learn and operate, time-saving	9	9	8	9	7	1
index	Platform supports phone or online ordering and feedback	Platform available to provide clean and tidy services to customers and make adjustments to feedback	Platform and system focus on user privacy protection	Platform available to provide services at the scheduled time	Platform available to offer different types of service packages and pricing based on user's needs and preferences	The system with simple interface, easy to learn and operate, time-saving
Platform supports phone or online ordering and feedback	1	1	1	1	1	1
Platform available to provide clean and tidy services to customers and make adjustments to feedback	1	1	1	1	1	1
Platform and system focus on user privacy protection	1	1	1	1	1	1
Platform available to provide services at the scheduled time	1	1	1	1	1	1		Expert9
Platform available to offer different types of service packages and pricing based on user's needs and preferences	1	1	1	1	1	1
The system with simple interface, easy to learn and operate, time-saving	1	1	1	1	1	1
index	Platform supports phone or online ordering and feedback	Platform available to provide clean and tidy services to customers and make adjustments to feedback	Platform and system focus on user privacy protection	Platform available to provide services at the scheduled time	Platform available to offer different types of service packages and pricing based on user's needs and preferences	The system with simple interface, easy to learn and operate, time-saving
Platform supports phone or online ordering and feedback	1	0.142857	3	0.2	0.2	0.333333
Platform available to provide clean and tidy services to customers and make adjustments to feedback	7	1	5	3	3	5
Platform and system focus on user privacy protection	0.333333	0.2	1	0.142857	0.2	0.142857
Platform available to provide services at the scheduled time	5	0.333333	7	1	3	3		Expert10
Platform available to offer different types of service packages and pricing based on user's needs and preferences	5	0.333333	5	0.333333	1	0.333333
The system with simple interface, easy to learn and operate, time-saving	3	0.2	7	0.333333	3	1
index	Platform supports phone or online ordering and feedback	Platform available to provide clean and tidy services to customers and make adjustments to feedback	Platform and system focus on user privacy protection	Platform available to provide services at the scheduled time	Platform available to offer different types of service packages and pricing based on user's needs and preferences	The system with simple interface, easy to learn and operate, time-saving
Platform supports phone or online ordering and feedback	1	1	1	1	1	1
Platform available to provide clean and tidy services to customers and make adjustments to feedback	1	1	3	1	3	1
Platform and system focus on user privacy protection	1	0.333333	1	0.333333	0.333333	0.333333
Platform available to provide services at the scheduled time	1	1	3	1	1	1		Expert11
Platform available to offer different types of service packages and pricing based on user's needs and preferences	1	0.333333	3	1	1	1
The system with simple interface, easy to learn and operate, time-saving	1	1	3	1	1	1
index	Platform supports phone or online ordering and feedback	Platform available to provide clean and tidy services to customers and make adjustments to feedback	Platform and system focus on user privacy protection	Platform available to provide services at the scheduled time	Platform available to offer different types of service packages and pricing based on user's needs and preferences	The system with simple interface, easy to learn and operate, time-saving
Platform supports phone or online ordering and feedback	1	1	1	1	1	1
Platform available to provide clean and tidy services to customers and make adjustments to feedback	1	1	1	1	1	1
Platform and system focus on user privacy protection	1	1	1	1	1	1
Platform available to provide services at the scheduled time	1	1	1	1	1	1		Expert12
Platform available to offer different types of service packages and pricing based on user's needs and preferences	1	1	1	1	1	1
The system with simple interface, easy to learn and operate, time-saving	1	1	1	1	1	1
index	Platform supports phone or online ordering and feedback	Platform available to provide clean and tidy services to customers and make adjustments to feedback	Platform and system focus on user privacy protection	Platform available to provide services at the scheduled time	Platform available to offer different types of service packages and pricing based on user's needs and preferences	The system with simple interface, easy to learn and operate, time-saving
Platform supports phone or online ordering and feedback	1	1	1	1	1	1
Platform available to provide clean and tidy services to customers and make adjustments to feedback	1	1	1	1	1	1
Platform and system focus on user privacy protection	1	1	1	1	1	1
Platform available to provide services at the scheduled time	1	1	1	1	1	1		Expert13
Platform available to offer different types of service packages and pricing based on user's needs and preferences	1	1	1	1	1	1
The system with simple interface, easy to learn and operate, time-saving	1	1	1	1	1	1
index	Platform supports phone or online ordering and feedback	Platform available to provide clean and tidy services to customers and make adjustments to feedback	Platform and system focus on user privacy protection	Platform available to provide services at the scheduled time	Platform available to offer different types of service packages and pricing based on user's needs and preferences	The system with simple interface, easy to learn and operate, time-saving
Platform supports phone or online ordering and feedback	1	0.333333	3	3	3	5
Platform available to provide clean and tidy services to customers and make adjustments to feedback	3	1	3	3	3	5
Platform and system focus on user privacy protection	0.333333	0.333333	1	3	3	5		Expert14
Platform available to provide services at the scheduled time	0.333333	0.333333	0.333333	1	3	5
Platform available to offer different types of service packages and pricing based on user's needs and preferences	0.333333	0.333333	0.333333	0.333333	1	1
The system with simple interface, easy to learn and operate, time-saving	0.2	0.2	0.2	0.2	1	1
index	Platform supports phone or online ordering and feedback	Platform available to provide clean and tidy services to customers and make adjustments to feedback	Platform and system focus on user privacy protection	Platform available to provide services at the scheduled time	Platform available to offer different types of service packages and pricing based on user's needs and preferences	The system with simple interface, easy to learn and operate, time-saving
Platform supports phone or online ordering and feedback	1	0.333333	0.142857	5	3	0.142857
Platform available to provide clean and tidy services to customers and make adjustments to feedback	3	1	0.142857	5	3	0.2
Platform and system focus on user privacy protection	7	7	1	7	5	0.5
Platform available to provide services at the scheduled time	0.2	0.2	0.142857	1	3	0.2
Platform available to offer different types of service packages and pricing based on user's needs and preferences	0.333333	0.333333	0.2	0.333333	1	0.142857		Expert15
The system with simple interface, easy to learn and operate, time-saving	7	5	2	5	7	1
