# Supplementary material for: A study on the quality evaluation index system of smart home care for older adults in the community ——based on Delphi and AHP
Source: BMC Public Health. 2023 Mar 1;23:411. doi: 10.1186/s12889-023-15262-1 (PMC9975439; doi:10.1186/s12889-023-15262-1)
Supplement: Supplementary file 6 — Additional file 6. Importance rating of index—second round. [file 12889_2023_15262_MOESM6_ESM.xlsx]

## Sheet: Sheet1
B1	B2	B3	B4	B5	C1	C2	C3	C4	C5	C6	C7	C8	C9	C10	C11	C12	C13	C14	C15	C16	C17	C18	C19	C20	C21	C22	C23	C24	C25	C26	C27	C28	C29	C30	C31	C32	C33
5	4	5	5	4	4	5	5	5	4	4	4	5	4	5	4	5	5	5	5	5	5	5	5	5	5	4	5	5	4	5	5	4	4	4	4	4	4
5	4	5	5	4	5	4	4	5	5	5	5	4	4	5	4	5	5	5	5	4	5	5	5	5	5	4	4	5	4	5	4	5	4	4	4	4	4
4	4	5	5	4	5	5	4	5	5	5	5	4	4	4	3	5	5	5	5	4	5	4	5	5	5	4	4	5	4	5	5	3	4	4	4	4	5
4	4	5	5	4	4	4	4	5	4	5	4	4	4	5	3	5	5	4	5	4	4	4	5	5	4	5	4	5	4	5	4	3	4	4	4	4	5
5	5	5	5	5	5	5	5	5	5	4	5	5	5	5	5	4	5	5	5	5	5	5	5	5	5	5	5	5	4	4	5	5	5	5	5	5	4
4	4	4	4	3	5	4	5	5	5	5	5	5	5	5	5	5	3	3	5	5	5	5	5	5	3	4	5	5	5	5	5	2	5	5	5	3	5
5	5	5	5	4	5	5	4	5	5	5	5	5	4	5	5	5	5	5	5	5	5	5	5	5	5	5	5	5	5	5	4	4	4	5	5	5	5
4	4	5	5	4	5	5	3	5	4	5	5	5	3	5	4	5	5	5	5	4	5	5	5	5	5	5	5	5	5	5	4	4	5	4	4	3	5
5	5	4	5	3	5	4	3	4	4	5	5	4	3	4	3	5	4	4	4	3	4	4	4	5	4	4	3	4	3	4	4	4	4	3	4	3	4
5	5	5	5	4	5	5	3	3	3	4	4	4	4	5	4	4	4	4	4	4	4	4	4	4	5	5	5	5	4	4	5	4	4	5	4	4	4
4	5	5	5	4	5	5	3	5	5	5	5	5	4	5	4	5	5	4	5	4	5	4	5	5	5	5	4	5	4	5	5	4	5	4	5	4	5
5	4	4	5	4	5	5	3	4	5	5	4	5	3	4	5	5	5	4	5	3	5	5	5	5	4	5	3	5	5	5	4	3	4	3	5	5	5
3	4	3	4	3	3	3	4	3	3	3	3	4	4	3	3	4	4	3	4	4	4	3	3	3	4	3	4	4	3	3	3	3	3	4	3	3	3
4	4	5	5	5	5	4	4	5	5	5	4	5	5	5	4	5	4	5	5	4	5	4	5	5	5	5	5	5	4	5	5	5	5	5	5	4	5
5	5	5	5	5	5	4	5	5	5	5	5	4	4	4	4	4	5	5	5	4	5	4	4	5	5	4	4	5	4	4	5	5	5	5	5	4	4
