# Supplementary material for: A study on the quality evaluation index system of smart home care for older adults in the community ——based on Delphi and AHP
Source: BMC Public Health. 2023 Mar 1;23:411. doi: 10.1186/s12889-023-15262-1 (PMC9975439; doi:10.1186/s12889-023-15262-1)
Supplement: Supplementary file 9 — Additional file 9. 1.Demographic information of the experts. [file 12889_2023_15262_MOESM9_ESM.xlsx]

## Sheet: Sheet1
Demographic information of the experts (n=15)
Expert	Gender	Age	Education level	Professional orientation	Title	Workplace	Professional years
Expert1	Female	60	Master's Degree	Social Security	Professor	Research Institutes	23
Expert2	Female	58	PhD degree	Social Security	Professor	Universities	22
Expert3	Female	58	PhD degree	Social Security	Professor	Universities	20
Expert4	Female	55	Bachelor degree or below	Senior Care	None	Associations	20
Expert5	Male	53	PhD degree	Health Management	Associate Professor	Universities	15
Expert6	Female	50	Bachelor degree or below	Nursing care	Deputy Chief Nurse	Senior Service Centers	11
Expert7	Female	48	Master's Degree	Health Management	Professor	Universities	8
Expert8	Female	47	PhD degree	Health Management	Associate Professor	Universities	10
Expert9	Female	46	Master's Degree	Health Management	Associate Professor	Universities	5
Expert10	Female	42	Master's Degree	Social Security	Associate Professor	Universities	15
Expert11	Female	39	Master's Degree	Nursing care	Deputy Chief Nurse	Hospitals	4
Expert12	Male	39	PhD degree	Social Security	Professor	Universities	10
Expert13	Male	36	Bachelor degree or below	Senior Care	None	Senior Service Centers	4
Expert14	Male	31	PhD degree	Health Management	Associate Professor	Universities	12
Expert15	Female	30	PhD degree	Health Management	Lecturer	Universities	6
